# Supplementary figures and images for: Temporal Trend of the SARS-CoV-2 Omicron Variant and RSV in the Nasal Cavity and Accuracy of the Newly Developed Antigen-Detecting Rapid Diagnostic Test
Source: MDPI journal article supplement (doi:10.3390/diagnostics14010119), 2024-01-04

Supplementary Figure S1. Method of RapidTesta RSV and SARS CoV-2 using RapidTesta Reader

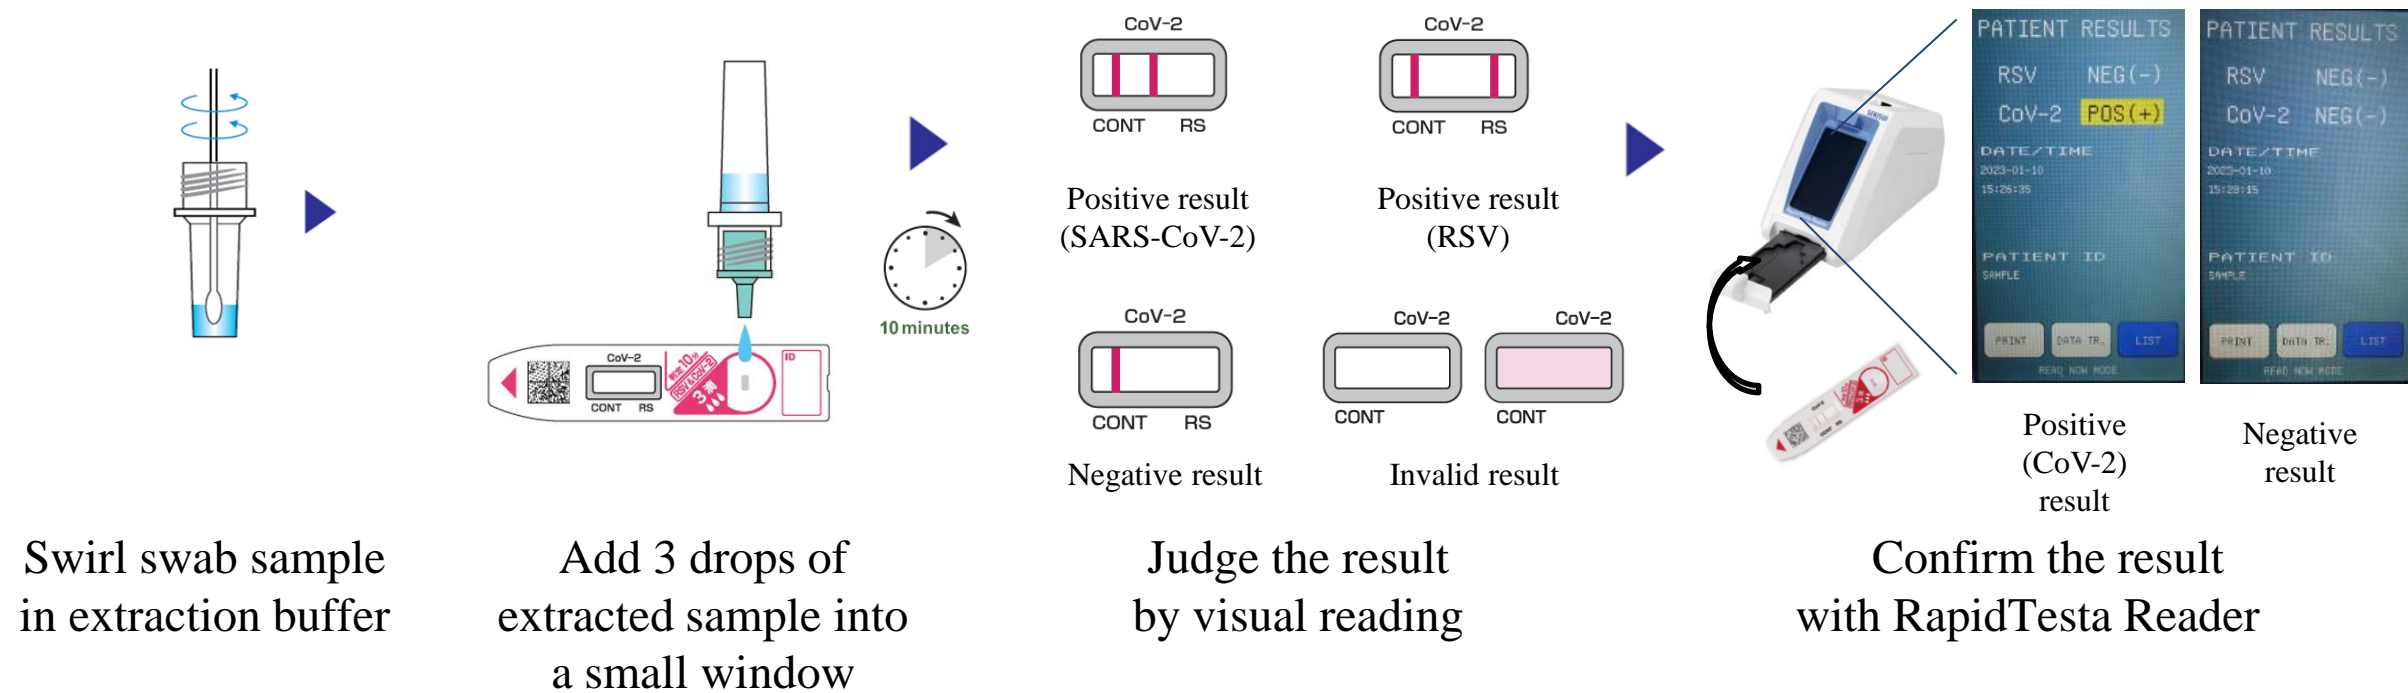

Supplement: s1 [file s1]
